# Supplementary material
Source: PubMed Central journal article supplement (PMC3684077)
Supplement: NIHMS470699-supplement-1.pdf [file NIHMS470699-supplement-1.pdf]

# Supplementary Information

## **Sam68 modulates the promoter specificity of NF- $\kappa$ B and mediates expression of CD25 in activated T cells**

Kai Fu <sup>1,6</sup>, Xin Sun <sup>1,6</sup>, Wenxin Zheng <sup>1,6</sup>, Eric M. Wier <sup>1</sup>, Andrea Hodgson <sup>1</sup>,  
Dat Q. Tran <sup>2</sup>, Stéphane Richard <sup>3,4,5</sup>, and Fengyi Wan <sup>1</sup>

<sup>1</sup> Department of Biochemistry and Molecular Biology, Bloomberg School of Public Health, Johns Hopkins University, Baltimore, MD 21025 USA;

<sup>2</sup> Department of Pediatrics, University of Texas-Houston Medical School, Houston, TX 77030;

<sup>3</sup> Terry Fox Molecular Oncology Group and the Bloomfield Center for Research on Aging, Lady Davis Institute for Medical Research, Sir Mortimer B. Davis Jewish General Hospital

<sup>4</sup> Department of Oncology

<sup>5</sup> Department of Medicine, McGill University, Montréal, Québec, H3T1E2, Canada.

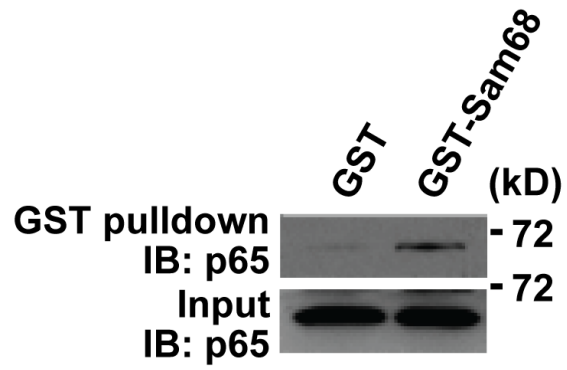

**Supplementary Figure S1. The nuclear interaction of Sam68 and p65.** Pull-down with recombinant GST or GST-Sam68 proteins with nuclear extracts derived from HUT102 cells, followed by immunoblotted (IB) for p65.

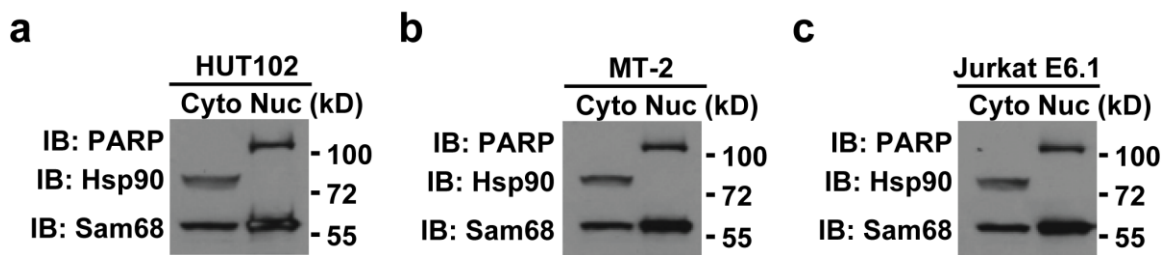

**Supplementary Figure S2. Sam68 preferentially localizes in the nucleus.** Immunoblot (IB) of the cytosolic (Cyto) and nuclear (Nuc) fractions from HUT102 cells (a), MT-2 cells (b), and Jurkat E6.1 cells (c). Hsp90 and PARP serve as cytosolic and nuclear markers, respectively.

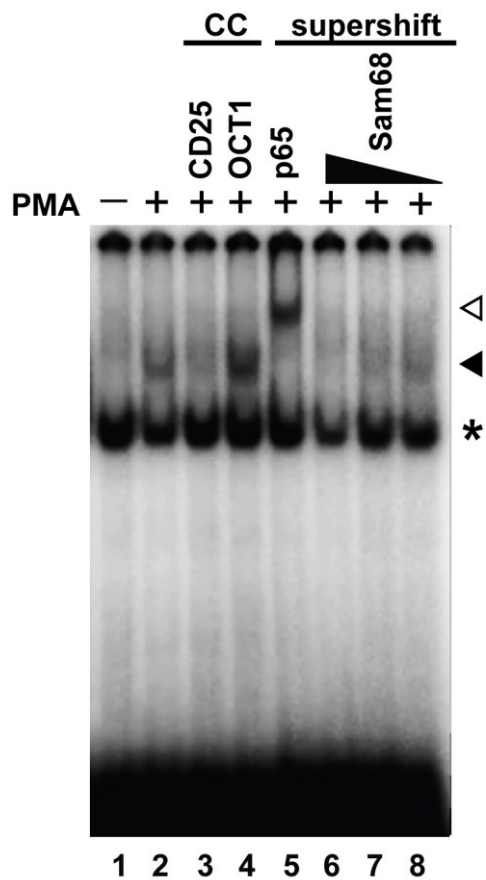

**Supplementary Figure S3. Sam68 is an integral component in the CD25 κB DNA binding complex.** Nuclear extracts of Jurkat cells treated with (+) or without (-) PMA (50 ng/ml, 30 min) were analyzed by EMSA with <sup>32</sup>P-labeled CD25 κB oligonucleotides, in some cases with 100-fold unlabeled CD25 κB or nonspecific OCT1 oligonucleotide competitors (CC). Supershift analysis was conducted with p65 or different doses of Sam68 antibodies (lanes 5-8). CD25 κB DNA binding complexes in Jurkat cells are labeled with a filled triangle, and the supershifted bands and nonspecific bands are labeled with an open triangle and an asterisk, respectively.

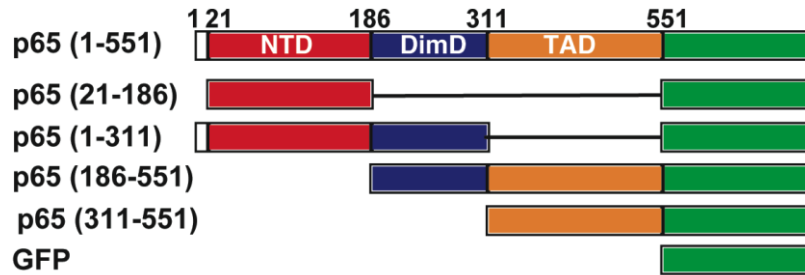

| vehicle/p65 truncated proteins | Sam68 interaction |
|--------------------------------|-------------------|
| GFP                            | -                 |
| p65 (1-551)                    | +                 |
| p65 (21-186)                   | -                 |
| p65 (1-311)                    | +                 |
| p65 (186-551)                  | -                 |
| p65 (311-551)                  | -                 |

**Supplementary Figure S4. Mapping the interaction between p65 and Sam68.** Schematic diagram of the truncation mutants of p65 fused with EGFP (*upper*). NTD, N-terminal domain; DimD, dimerization domain; TAD, transcriptional activation domain. EGFP-p65 truncated constructs and myc-Sam68 were transfected into HEK293T cells. The lysates were immunoprecipitated by myc antibody and probed for GFP-p65 truncated proteins. The binding capabilities of p65 truncates to Sam68 were summarized as +, detectable interaction; -, undetectable interaction (*bottom*).

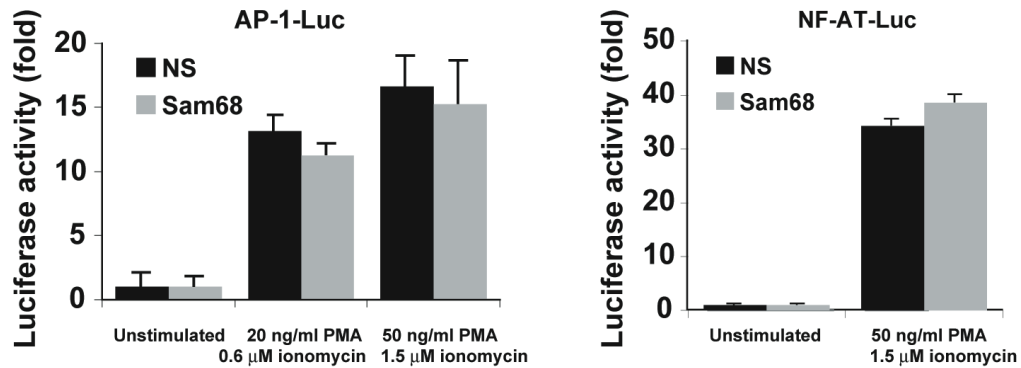

**Supplementary Figure S5. The effects of knockdown of Sam68 on T cell receptor stimulation-induced AP-1 and NF-AT expression.** Knockdown of Sam68 did not impair T cell receptor stimulation-induced AP-1 or NF-AT signaling in Jurkat T lymphocytes. AP-1 (*left*) and NF-AT (*right*) luciferase assays (mean  $\pm$  S.D., n = 3) of Jurkat cells transfected with Sam68 or scramble non-specific (NS) siRNAs, and stimulated as indicated.

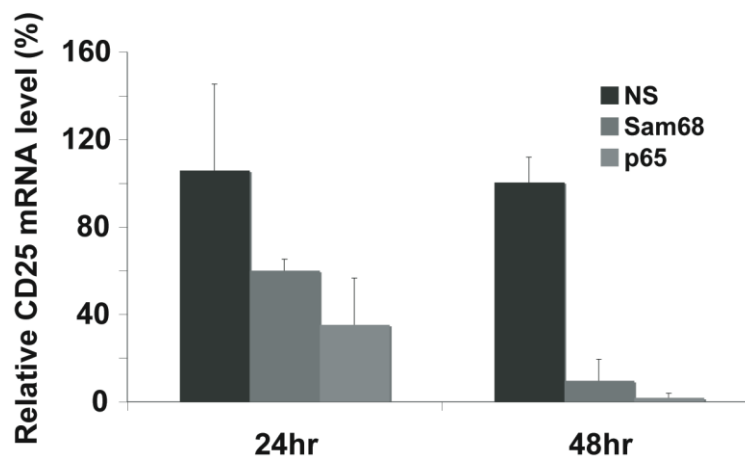

**Supplementary Figure S6. The effect of Sam68 knockdown on the *CD25* gene transcription in HUT102 cells.** Real-time PCR quantitation (mean  $\pm$  S.D., n = 3) of mRNA level of *CD25* normalized to *GAPDH* in HUT102 cells after transfected with Sam68, p65 or scramble non-specific (NS) siRNAs for indicated periods. The relative mRNA level (%) was normalized to NS siRNA transfected.

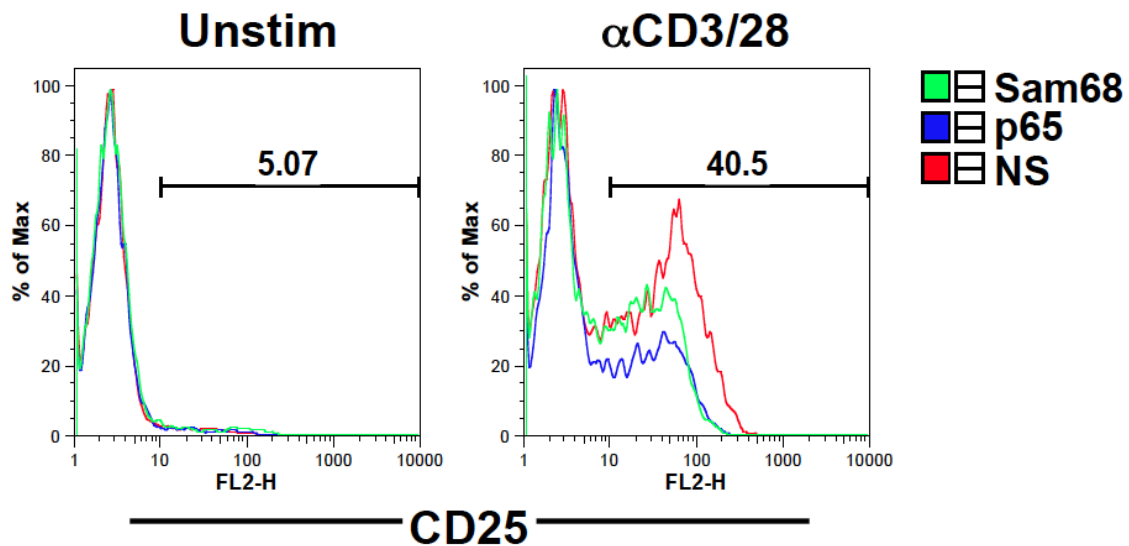

**Supplementary Figure S7. Knockdown of Sam68 attenuates the T cell receptor engagement-induced CD25 expression.** Human peripheral blood T lymphocytes were transfected with nonspecific (NS), p65, or Sam68 siRNAs and then stimulated with anti-CD3/CD28 antibodies ( $\alpha$ CD3/CD28, 1  $\mu$ g/ml each) or left unstimulated (Unstim). Flow cytometry histograms of T cells with CD25 induction were assessed 12 hr later. The percentage of CD25<sup>+</sup> cells and of dividing cells in NS silenced cells is shown.



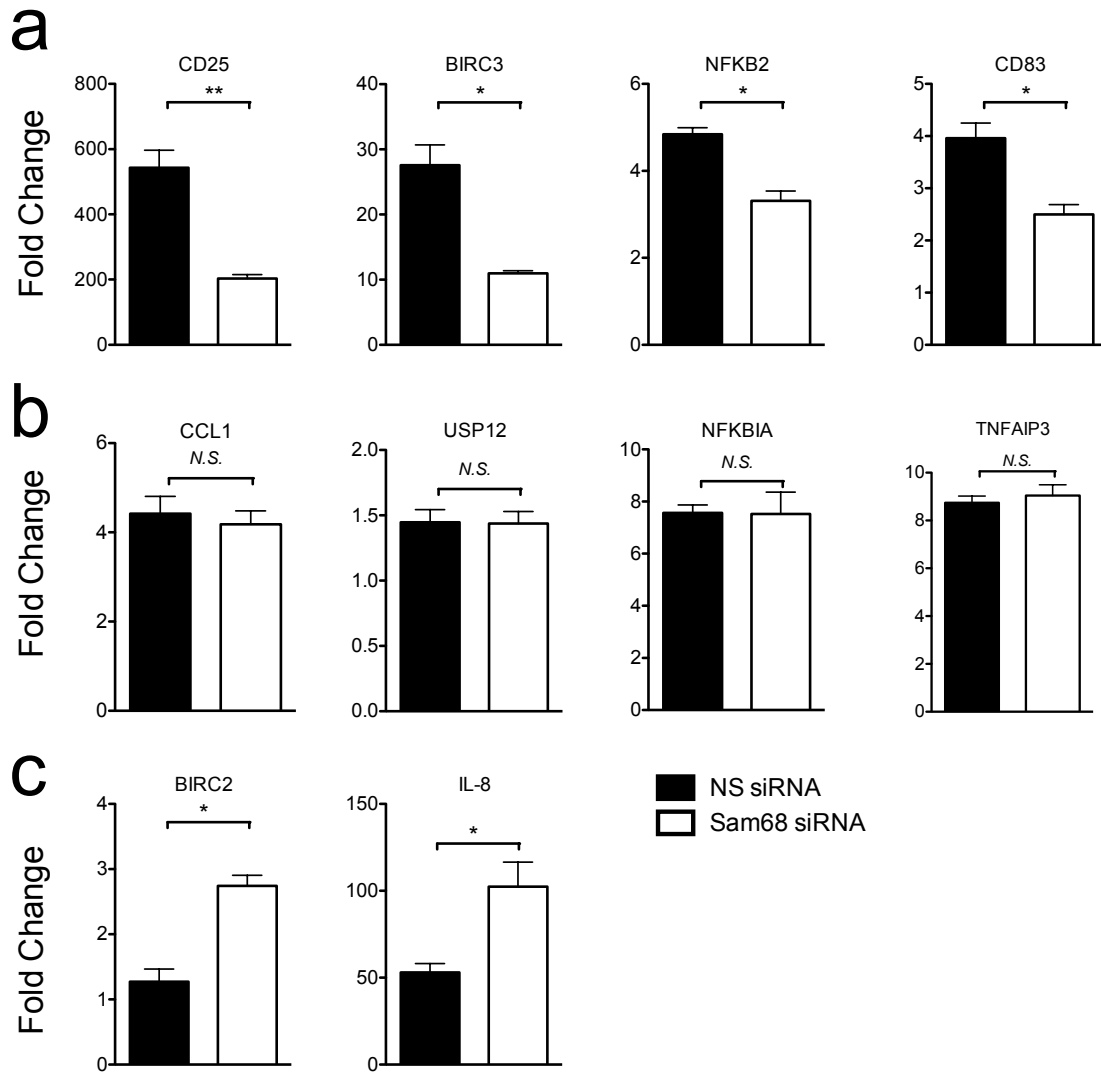

**Supplementary Figure S8. The effect of Sam68 knockdown on the induction of selected NF- $\kappa$ B target genes.** (a-c) Real-time PCR quantization of mRNA level of indicated NF- $\kappa$ B target genes normalized to *GAPDH* in Jurkat cells silenced with NS or pooled Sam68 siRNAs and stimulated with or without 50 ng/ml PMA plus 1.5  $\mu$ M ionomycin for 2 hr. The *SAM68* gene was downregulated by 50%, as measured by Real-time PCR. The induction (fold change) of indicated genes corresponds to a further normalization of stimulated sample to unstimulated sample (mean  $\pm$  S.D., n = 3). Not statistically significant (N.S.), \*  $P < 0.05$ , \*\*  $P < 0.01$ , calculated by Student's *t*-test.

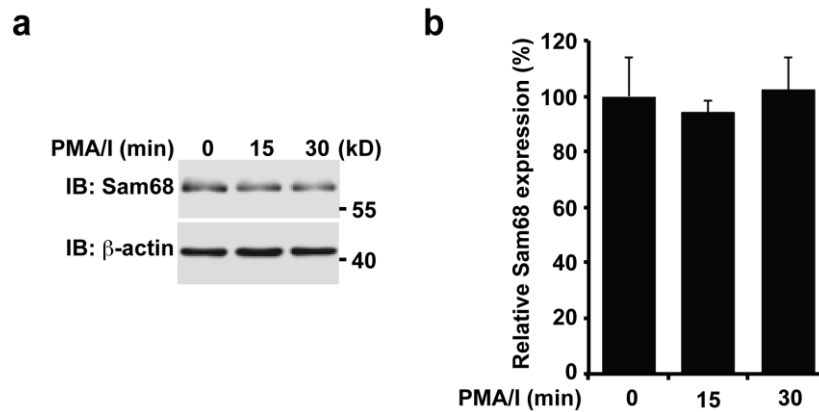

**Supplementary Figure S9. T cell receptor stimulation does not induce the expression of Sam68.** (a) Representative immunoblot (IB) for indicated proteins in the whole cell lysates derived from Jurkat T lymphocytes stimulated with 50 ng/ml PMA plus 1.5  $\mu$ M ionomycin (PMA/I) for indicated period. (b) Relative Sam68 expression in Jurkat T lymphocytes stimulated as in (a) (mean  $\pm$  S.D., n = 3). Densitometry of all bands was performed, and the intensity of each Sam68 band was normalized to corresponding  $\beta$ -actin band. The fold change of Sam68/ $\beta$ -actin was further normalized to the 0-min samples (set as 100%).

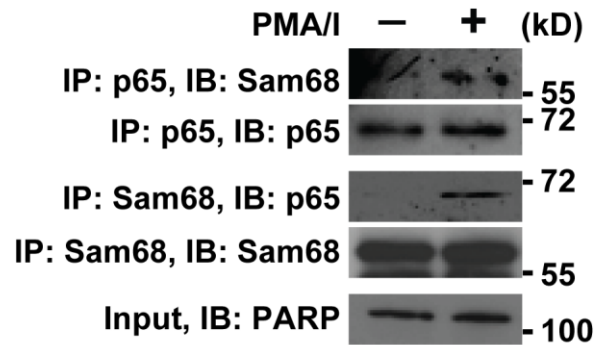

**Supplementary Figure S10. The association of Sam68 and p65 is enhanced in stimulated Jurkat cells.** Immunoprecipitation (IP)/immunoblot (IB), as indicated, in the nuclear extracts from Jurkat T lymphocytes with (+) or without (-) 50 ng/ml PMA plus 1.5  $\mu$ M ionomycin (PMA/I).

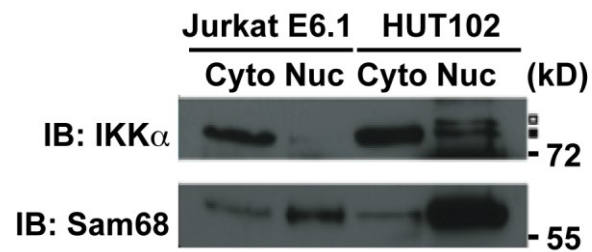

**Supplementary Figure S11. Elevated nuclear IKK $\alpha$  in CD25 highly expressing HUT102 cells.** Immunoblot (IB) of the cytosolic (Cyto) and nuclear (Nuc) fractions from identical Jurkat or HUT102 cells. Filled and open symbols indicate non-phosphorylated and phosphorylated forms, respectively.

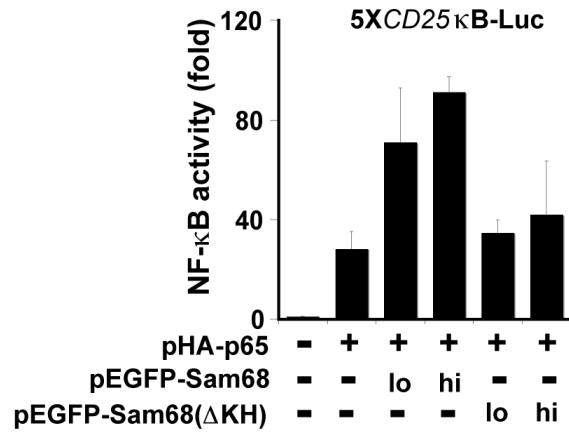

**Supplementary Figure S12. The Sam68-p65 interaction is required for induction of CD25 expression.** NF-κB luciferase assay (mean ± S.D., n = 3) of Jurkat cells transfected with p65 and low (lo) or high (hi) dose of indicated GFP-fused wild type or mutant Sam68 plasmids together with a luciferase reporter gene driven by 5 × CD25 κB sites.
